# Supplementary material for: Determining Cognitive Workload Using Physiological Measurements: Pupillometry and Heart-Rate Variability
Source: MDPI journal article supplement (doi:10.3390/s24062010), 2024-03-21
Supplement: s1 [file s1]

**Table S1.** Non-parametric statistics results summary table for pupillometry parameter baselined pupil dilation

| Statistic type       | Variable       | Complexity effect                                 | Complexity: expertise effect              |
|----------------------|----------------|---------------------------------------------------|-------------------------------------------|
| Wald-Type Statistic  | Pupil dilation | Complexity: $\chi^2(3) = 77.664, P < 0.001^{***}$ | $\chi^2(3) = 2.246, P = 0.523(\text{ns})$ |
| ANOVA-Type Statistic | Pupil dilation | Complexity : $F(2.147) = 38.710, P < 0.001^{***}$ | $F(2.147) = 0.445, P = 0.655(\text{ns})$  |

**Table S2.** Relative treatment effects summary table for pupillometry parameter baselined pupil dilation

| Effect                | Baseline(95% CI)    | Low TC(95% CI)       | Medium TC(95% CI)   | High TC(95% CI)      |
|-----------------------|---------------------|----------------------|---------------------|----------------------|
| Complexity            | 0.169               | 0.577                | 0.661               | 0.565                |
| Complexity:expert     | 0.169(0.119, 0.245) | 0.525 (0.382, 0.662) | 0.652(0.489, 0.780) | 0.534(0.379, 0.682)  |
| Complexity:non-expert | 0.169(0.124, 0.253) | 0.630(0.515, 0.728)  | 0.671(0.538, 0.772) | 0.596 (0.472, 0.704) |

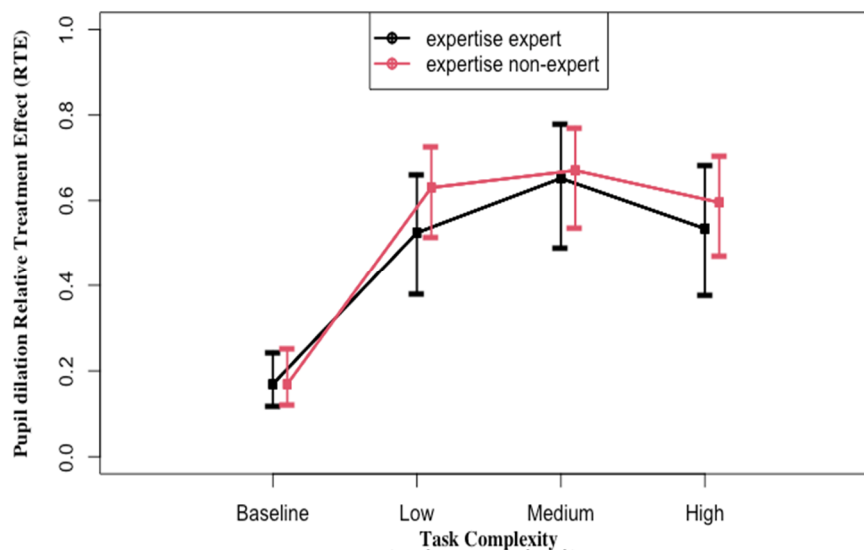

**Figure S1.** Relative treatment effects for pupillometry parameter baselined pupil dilation within the interaction of task complexity and expertise.

**Table S3.** Multiple comparisons of parameter baselined peak pupil dilation in the engine assembly study with Bonferroni adjustment.

| Comparison            | Hypothesis                                                                                                                                                               | ANOVA-Type Statistic p-value                                   | Adjusted p-value (Bonferroni adjustment)                     |
|-----------------------|--------------------------------------------------------------------------------------------------------------------------------------------------------------------------|----------------------------------------------------------------|--------------------------------------------------------------|
| Baseline vs Low TC    | Complexity:H0:<br>$\mu_{\text{baseline}}=\mu_{\text{low}}$<br>Interaction:H0: $\mu_{\text{expert } i} = \mu_{\text{non-expert } i}$ for $i = \text{baseline, low.}$      | p-value(complexity)<0.0001***<br>p-value(interaction) = 0.584  | p-value(complexity)<0.0001***<br>p-value(interaction) =3.504 |
| Baseline vs Medium TC | Complexity:H0:<br>$\mu_{\text{baseline}}=\mu_{\text{medium}}$<br>Interaction:H0: $\mu_{\text{expert } i} = \mu_{\text{non-expert } i}$ for $i = \text{baseline,medium.}$ | p-value(complexity)<0.001***<br>p-value(interaction)= 0.821    | p-value(complexity)<0.001***<br>p-value(interaction)= 4.927  |
| Baseline vs High TC   | Complexity:H0:<br>$\mu_{\text{baseline}}=\mu_{\text{high}}$<br>Interaction:H0: $\mu_{\text{expert } i} = \mu_{\text{non-expert } i}$ for $i = \text{baseline,high.}$     | p-value(complexity)= <0.001***<br>p-value(interaction) = 0.937 | p-value(complexity)<0.001***<br>p-value(interaction)= 5.624  |
| Low TC vs Medium TC   | Complexity:H0:<br>$\mu_{\text{low}}=\mu_{\text{medium}}$<br>Interaction:H0: $\mu_{\text{expert } i} = \mu_{\text{non-expert } i}$ for $i = \text{low,medium.}$           | p-value(complexity)= 0.026<br>p-value(interaction)= 0.268      | p-value(complexity)= 0.154<br>p-value(interaction)= 1.609    |
| Low TC vs High TC     | Complexity:H0: $\mu_{\text{low}}=\mu_{\text{high}}$<br>Interaction:H0: $\mu_{\text{expert } i} = \mu_{\text{non-expert } i}$ for $i = \text{low,high.}$                  | p-value(complexity)= 0.729<br>p-value(interaction)= 0.434      | p-value(complexity)= 4.374<br>p-value(interaction)= 2.606    |
| Medium vs High TC     | complexity: H0:<br>$\mu_{\text{medium}}=\mu_{\text{high}}$<br>Interaction:H0: $\mu_{\text{expert } i} = \mu_{\text{non-expert } i}$ for $i = \text{medium,high.}$        | p-value(complexity)= 0.024<br>p-value(interaction)= 0.527      | p-value(complexity)= 0.146<br>p-value(interaction)= 3.161    |

**Table S4.** Non-parametric statistics results summary table for cardiac parameter baselined PNN50

| Statistic type       | Variable | Complexity effect              | Complexity:expertise effect            |
|----------------------|----------|--------------------------------|----------------------------------------|
| Wald-Type Statistic  | PNN50    | $\chi^2(3) = 9.650, P=0.022^*$ | $\chi^2(3)= 10.074, P=0.018^*$         |
| ANOVA-Type Statistic | PNN50    | $F(2.615) = 2.963, P=0.038^*$  | $F(2.615)= 2.273, P= 0.087(\text{ns})$ |

**Table S5.** Relative treatment effects summary table for cardiac parameter baselined PNN50.

| Effect                | Baseline(95% CI)    | Low TC(95% CI)      | Medium TC(95% CI)   | High TC(95% CI)      |
|-----------------------|---------------------|---------------------|---------------------|----------------------|
| Complexity            | 0.416               | 0.553               | 0.618               | 0.522                |
| Complexity:expert     | 0.404(0.265, 0.566) | 0.673(0.452, 0.828) | 0.719(0.473, 0.866) | 0.684 (0.498, 0.817) |
| Complexity:non-expert | 0.427(0.306, 0.562) | 0.434(0.311, 0.569) | 0.516(0.337, 0.690) | 0.361 (0.260, 0.485) |

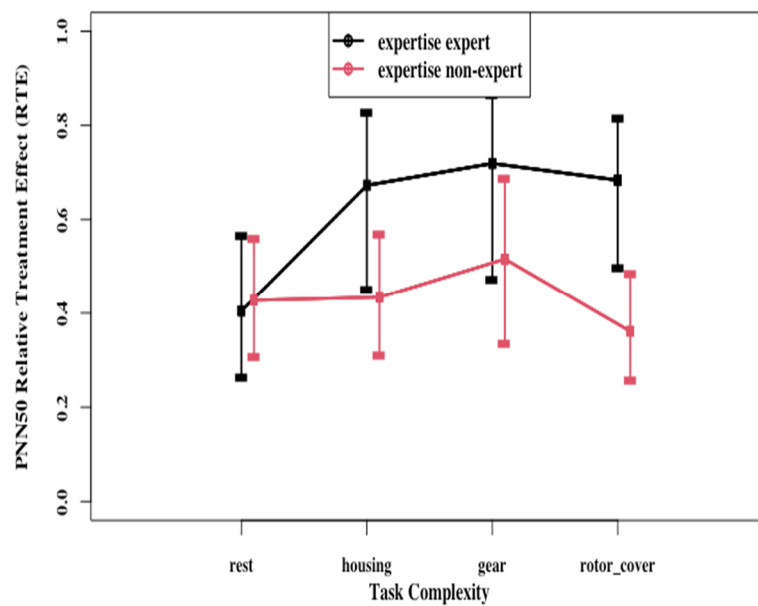

**Figure S2.** Relative treatment effects for cardiac parameter baselined PNN50 within the interaction of task complexity and expertise.

**Table S6.** Multiple comparisons of parameter baselined PNN50 in the engine assembly study with Bonferroni adjustment.

| Comparison            | Hypothesis                                                                                                                                                               | ANOVA-Type Statistic p-value                                 | Adjusted p-value (Bonferroni adjustment)                   |
|-----------------------|--------------------------------------------------------------------------------------------------------------------------------------------------------------------------|--------------------------------------------------------------|------------------------------------------------------------|
| Baseline vs Low TC    | Complexity:H0:<br>$\mu_{\text{baseline}}=\mu_{\text{low}}$<br>Interaction:H0: $\mu_{\text{expert } i} = \mu_{\text{non-expert } i}$ for $i = \text{baseline, low.}$      | p-value(complexity)= 0.022*<br>p-value(interaction) =0.077   | p-value(complexity)=0.135<br>p-value(interaction) =0.460   |
| Baseline vs Medium TC | Complexity:H0:<br>$\mu_{\text{baseline}}=\mu_{\text{medium}}$<br>Interaction:H0: $\mu_{\text{expert } i} = \mu_{\text{non-expert } i}$ for $i = \text{baseline,medium.}$ | p-value(complexity)= 0.006**<br>p-value(interaction)= 0.046* | p-value(complexity)= 0.037*<br>p-value(interaction)= 0.278 |
| Baseline vs High TC   | Complexity:H0:<br>$\mu_{\text{baseline}}=\mu_{\text{high}}$<br>Interaction:H0: $\mu_{\text{expert } i} = \mu_{\text{non-expert } i}$ for $i = \text{baseline,high.}$     | p-value(complexity)= 0.195<br>p-value(interaction) =0.002**  | p-value(complexity)= 1.172<br>p-value(interaction)= 0.015* |
| Low TC vs Medium TC   | Complexity:H0:<br>$\mu_{\text{low}}=\mu_{\text{medium}}$<br>Interaction:H0: $\mu_{\text{expert } i} = \mu_{\text{non-expert } i}$ for $i = \text{low,medium.}$           | p-value(complexity)= 0.157<br>p-value(interaction)= 0.674    | p-value(complexity)= 0.941<br>p-value(interaction)= 4.043  |
| Low TC vs High TC     | Complexity:H0: $\mu_{\text{low}}=\mu_{\text{high}}$<br>Interaction:H0: $\mu_{\text{expert } i} = \mu_{\text{non-expert } i}$ for $i = \text{low,high.}$                  | p-value(complexity)= 0.835<br>p-value(interaction)= 0.472    | p-value(complexity)= 5.008<br>p-value(interaction)= 2.833  |
| Medium vs High TC     | complexity: H0:<br>$\mu_{\text{medium}}=\mu_{\text{high}}$<br>Interaction:H0: $\mu_{\text{expert } i} = \mu_{\text{non-expert } i}$ for $i = \text{medium,high.}$        | p-value(complexity)= 0.037*<br>p-value(interaction)= 0.376   | p-value(complexity)= 0.224<br>p-value(interaction)= 2.255  |

**Table S7.** Non-parametric statistics results summary table for pupillometry cognitive workload index

| Statistic type       | Variable           | Complexity effect                                 | Complexity:expertise effect               |
|----------------------|--------------------|---------------------------------------------------|-------------------------------------------|
| Wald-Type Statistic  | pupillometry index | Complexity: $\chi^2(3) = 280.264, P < .001^{***}$ | $\chi^2(3) = 1.419, P = 0.701(\text{ns})$ |
| ANOVA-Type Statistic | pupillometry index | Complexity : $F(2.413) = 35.335, p < .001^{***}$  | $F(2.413) = 0.629, P = 0.562(\text{ns})$  |

**Table S8.** Relative treatment effects summary table for pupillometry cognitive workload index

| Effect                | Baseline(95% CI)     | Low TC(95% CI)       | Medium TC (95% CI)   | High TC(95% CI)      |
|-----------------------|----------------------|----------------------|----------------------|----------------------|
| Complexity            | 0.196                | 0.503                | 0.447                | 0.819                |
| Complexity:expert     | 0.191 (0.114, 0.325) | 0.429 (0.303, 0.567) | 0.445 (0.305, 0.597) | 0.777 (0.671, 0.850) |
| Complexity:non-expert | 0.200 (0.150, 0.276) | 0.577 (0.443, 0.696) | 0.449 (0.330, 0.578) | 0.860 (0.800, 0.891) |

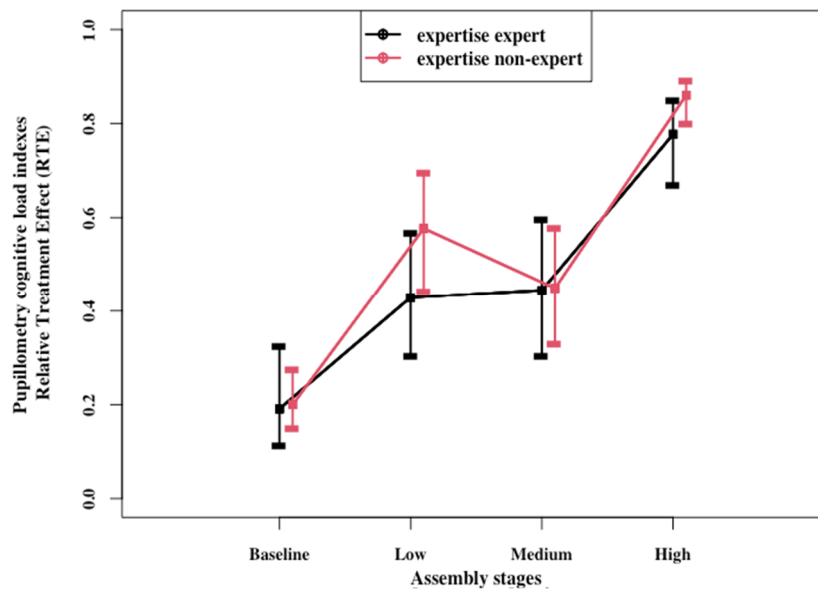

**Figure S3.** Relative treatment effects for pupillometry cognitive load index within the interaction of task complexity and expertise.

**Table S9.** Multiple comparisons of parameter pupillometry cognitive load index in the engine assembly study with Bonferroni adjustment

| Comparison            | Hypothesis                                                                                                                                                         | ANOVA-Type Statistic p-value                                   | Adjusted p-value (Bonferroni adjustment)                      |
|-----------------------|--------------------------------------------------------------------------------------------------------------------------------------------------------------------|----------------------------------------------------------------|---------------------------------------------------------------|
| Baseline vs Low TC    | Complexity:H0: $\mu_{\text{baseline}} = \mu_{\text{low}}$<br>Interaction:H0: $\mu_{\text{expert}} = \mu_{\text{non-expert}}$ for $i = \text{baseline, low.}$       | p-value(complexity)<0.0001****<br>p-value(interaction) = 0.514 | p-value(complexity)<0.001***<br>p-value(interaction) = 3.084  |
| Baseline vs Medium TC | Complexity:H0: $\mu_{\text{baseline}} = \mu_{\text{medium}}$<br>Interaction:H0: $\mu_{\text{expert}} = \mu_{\text{non-expert}}$ for $i = \text{baseline, medium.}$ | p-value(complexity)<0.0001****<br>p-value(interaction)= 0.820  | p-value(complexity)<0.0001****<br>p-value(interaction)= 4.921 |
| Baseline vs High TC   | Complexity:H0: $\mu_{\text{baseline}} = \mu_{\text{high}}$<br>Interaction:H0: $\mu_{\text{expert}} = \mu_{\text{non-expert}}$ for $i = \text{baseline, high.}$     | p-value(complexity)<0.0001****<br>p-value(interaction) = 0.331 | p-value(complexity)<0.0001****<br>p-value(interaction)= 1.987 |
| Low TC vs Medium TC   | Complexity:H0: $\mu_{\text{low}} = \mu_{\text{medium}}$<br>Interaction:H0: $\mu_{\text{expert}} = \mu_{\text{non-expert}}$ for $i = \text{low, medium.}$           | p-value(complexity)= 0.347<br>p-value(interaction)= 0.252      | p-value(complexity)= 2.082<br>p-value(interaction)= 1.515     |
| Low TC vs High TC     | Complexity:H0: $\mu_{\text{low}} = \mu_{\text{high}}$<br>Interaction:H0: $\mu_{\text{expert}} = \mu_{\text{non-expert}}$ for $i = \text{low, high.}$               | p-value(complexity)<0.0001****<br>p-value(interaction)= 0.758  | p-value(complexity)<0.0001****<br>p-value(interaction)= 4.546 |
| Medium vs High TC     | complexity: H0: $\mu_{\text{medium}} = \mu_{\text{high}}$<br>Interaction:H0: $\mu_{\text{expert}} = \mu_{\text{non-expert}}$ for $i = \text{medium, high.}$        | p-value(complexity)<0.0001****<br>p-value(interaction)= 0.407  | p-value(complexity)<0.0001****<br>p-value(interaction)= 2.444 |

**Table S10.** Non-parametric statistics results summary table for cardiac cognitive workload index

| Statistic type       | Variable                         | Complexity effect                                | Complexity:expertise effect               |
|----------------------|----------------------------------|--------------------------------------------------|-------------------------------------------|
| Wald-Type Statistic  | cardiac cognitive workload index | Complexity: $\chi^2(3) = 31.645, P < .001^{***}$ | $\chi^2(3) = 4.963, P = 0.175(\text{ns})$ |
| ANOVA-Type Statistic | cardiac cognitive workload index | Complexity: $F(2.507) = 9.555, p < .001^{***}$   | $F(2.507) = 1.288, P = 0.277$             |

**Table S11.** Relative treatment effects summary table for cardiac cognitive workload index.

| Effect                | Baseline(95% CI)    | Low TC(95% CI)      | Medium TC (95% CI)   | High TC(95% CI)      |
|-----------------------|---------------------|---------------------|----------------------|----------------------|
| Complexity            | 0.481               | 0.413               | 0.311                | 0.738                |
| Complexity:expert     | 0.495(0.356,0.635)  | 0.279 (0.158,0.463) | 0.306 (0.167, 0.510) | 0.673(0.424,0.841)   |
| Complexity:non-expert | 0.467 (0.367,0.572) | 0.548(0.407,0.678)  | 0.316(0.198,0.484)   | 0.804 (0.645, 0.878) |

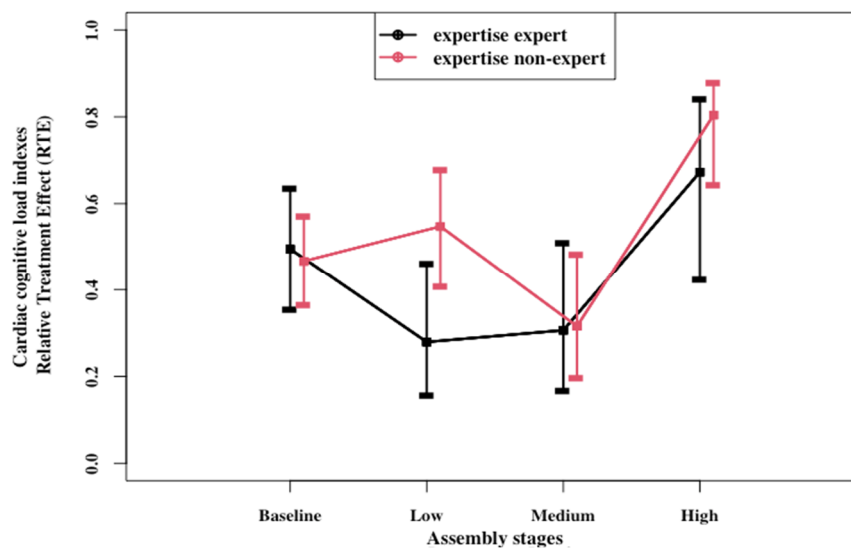

**Figure S4.** Relative treatment effects for cardiac cognitive load index within the interaction of task complexity and expertise.

**Table S12.** Multiple comparisons of parameter cardiac cognitive load index in the engine assembly study with Bonferroni adjustment

| Comparison            | Hypothesis                                                                                                                                                        | ANOVA-Type Statistic p-value                                  | Adjusted p-value (Bonferroni adjustment)                      |
|-----------------------|-------------------------------------------------------------------------------------------------------------------------------------------------------------------|---------------------------------------------------------------|---------------------------------------------------------------|
| Baseline vs Low TC    | Complexity:H0: $\mu_{\text{baseline}}=\mu_{\text{low}}$<br>Interaction:H0: $\mu_{\text{expert}i} = \mu_{\text{non-expert}i}$ for $i = \text{baseline, low.}$      | p-value(complexity)= 0.244<br>p-value(interaction) = 0.038*   | p-value(complexity)= 1.465<br>p-value(interaction) =0.231     |
| Baseline vs Medium TC | Complexity:H0: $\mu_{\text{baseline}}=\mu_{\text{medium}}$<br>Interaction:H0: $\mu_{\text{expert}i} = \mu_{\text{non-expert}i}$ for $i = \text{baseline,medium.}$ | p-value(complexity)= 0.005**<br>p-value(interaction)= 0.876   | p-value(complexity)= 0.030*<br>p-value(interaction)= 5.256    |
| Baseline vs High TC   | Complexity:H0: $\mu_{\text{baseline}}=\mu_{\text{high}}$<br>Interaction:H0: $\mu_{\text{expert}i} = \mu_{\text{non-expert}i}$ for $i = \text{baseline,high.}$     | p-value(complexity)<0.001***<br>p-value(interaction) = 0.349  | p-value(complexity)<0.01**<br>p-value(interaction)= 2.092     |
| Low TC vs Medium TC   | Complexity:H0: $\mu_{\text{low}}=\mu_{\text{medium}}$<br>Interaction:H0: $\mu_{\text{expert}i} = \mu_{\text{non-expert}i}$ for $i = \text{low,medium.}$           | p-value(complexity)= 0.247<br>p-value(interaction)= 0.174     | p-value(complexity)= 1.482<br>p-value(interaction)= 1.047     |
| Low TC vs High TC     | Complexity:H0: $\mu_{\text{low}}=\mu_{\text{high}}$<br>Interaction:H0: $\mu_{\text{expert}i} = \mu_{\text{non-expert}i}$ for $i = \text{low,high.}$               | p-value(complexity)<0.001***<br>p-value(interaction)= 0.660   | p-value(complexity)<0.01**<br>p-value(interaction)= 3.959     |
| Medium vs High TC     | Complexity: H0: $\mu_{\text{medium}}=\mu_{\text{high}}$<br>Interaction:H0: $\mu_{\text{expert}i} = \mu_{\text{non-expert}i}$ for $i = \text{medium,high.}$        | p-value(complexity)<0.0001****<br>p-value(interaction)= 0.282 | p-value(complexity)<0.0001****<br>p-value(interaction)= 1.690 |

**Table S13.** Non-parametric statistics results summary table for completion time

| Statistic type       | Variable        | Complexity effect                         | Complexity:expertise effect               |
|----------------------|-----------------|-------------------------------------------|-------------------------------------------|
| Wald-Type Statistic  | Completion time | $\chi^2(3) = 552.035$ ,<br>$P<.001^{***}$ | $\chi^2(3)= 3.523$ , $P=0.318(\text{ns})$ |
| ANOVA-Type Statistic | Completion time | $F(2.119) = 68.986$ , $P<.001^{***}$      | $F(2.119)= 0.717$ , $P= 0.496(\text{ns})$ |

**Table S14.** Relative treatment effects summary table for variable completion time

| Effect                | Baseline(95% CI)     | Low TC(95% CI)       | Medium TC(95% CI)   | High TC(95% CI)      |
|-----------------------|----------------------|----------------------|---------------------|----------------------|
| Complexity            | 0.123                | 0.534                | 0.495               | 0.821                |
| Complexity:expert     | 0.115(0.083,0.170 )  | 0.480 (0.366, 0.598) | 0.505(0.431, 0.579) | 0.779 (0.661, 0.858) |
| Complexity:non-expert | 0.130 (0.112, 0.159) | 0.588 (0.482, 0.682) | 0.486 (0.390,0.583) | 0.862(0.795, 0.894)  |

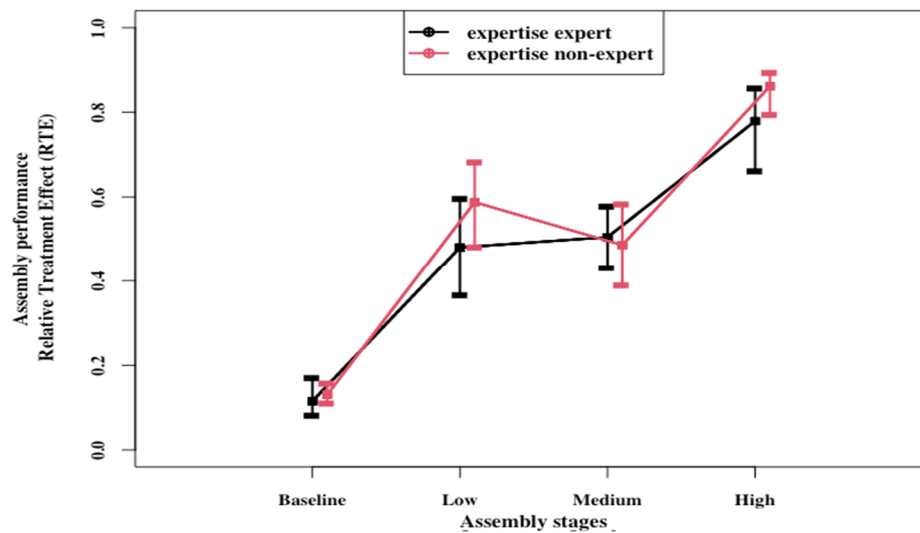

**Figure S5.** Relative treatment effects for assembly performance ( completion time) within the interaction of task complexity and expertise.

**Table S15.** Multiple comparisons of parameter assembly performance in the engine assembly study with Bonferroni adjustment

| Comparison            | Hypothesis                                                                                                                                                          | ANOVA-Type Statistic p-value                                   | Adjusted p-value (Bonferroni adjustment)                       |
|-----------------------|---------------------------------------------------------------------------------------------------------------------------------------------------------------------|----------------------------------------------------------------|----------------------------------------------------------------|
| Baseline vs Low TC    | Complexity:H0: $\mu_{\text{baseline}} = \mu_{\text{low}}$<br>Interaction:H0: $\mu_{\text{expert}} = \mu_{\text{non-expert}}$ for $i = \text{baseline, low}$ .       | p-value(complexity)<0.0001****<br>p-value(interaction) = 0.703 | p-value(complexity)<0.0001****<br>p-value(interaction) = 4.220 |
| Baseline vs Medium TC | Complexity:H0: $\mu_{\text{baseline}} = \mu_{\text{medium}}$<br>Interaction:H0: $\mu_{\text{expert}} = \mu_{\text{non-expert}}$ for $i = \text{baseline, medium}$ . | p-value(complexity)<0.0001****<br>p-value(interaction)= 0.420  | p-value(complexity)<0.0001****<br>p-value(interaction)= 2.521  |
| Baseline vs High TC   | Complexity:H0: $\mu_{\text{baseline}} = \mu_{\text{high}}$<br>Interaction:H0: $\mu_{\text{expert}} = \mu_{\text{non-expert}}$ for $i = \text{baseline, high}$ .     | p-value(complexity)<0.0001****<br>p-value(interaction) = 0.487 | p-value(complexity)<0.0001****<br>p-value(interaction)= 2.920  |
| Low TC vs Medium TC   | Complexity:H0: $\mu_{\text{low}} = \mu_{\text{medium}}$<br>Interaction:H0: $\mu_{\text{expert}} = \mu_{\text{non-expert}}$ for $i = \text{low, medium}$ .           | p-value(complexity)= 0.486<br>p-value(interaction)= 0.098      | p-value(complexity)= 2.914<br>p-value(interaction)= 0.587      |
| Low TC vs High TC     | Complexity:H0: $\mu_{\text{low}} = \mu_{\text{high}}$<br>Interaction:H0: $\mu_{\text{expert}} = \mu_{\text{non-expert}}$ for $i = \text{low, high}$ .               | p-value(complexity)<0.0001****<br>p-value(interaction)= 0.870  | p-value(complexity)<0.0001****<br>p-value(interaction)= 5.217  |
| Medium vs High TC     | complexity: H0: $\mu_{\text{medium}} = \mu_{\text{high}}$<br>Interaction:H0: $\mu_{\text{expert}} = \mu_{\text{non-expert}}$ for $i = \text{medium, high}$ .        | p-value(complexity)<0.0001****<br>p-value(interaction)= 0.385  | p-value(complexity)<0.0001****<br>p-value(interaction)= 2.307  |
